# Supplementary material
Source: publisher figshare collection journal article supplement (https://gsapubs.figshare.com/articles/dataset/_/21676805)

Hildreth, W., Fierstein, J., and Vazquez, J., 2022, Ages of the granitic basement of Long Valley Caldera, California, USA, and siting of the Quaternary granite-rhyolite pluton: GSA Bulletin, <https://doi.org/10.1130/B36589.1>.

## Supplemental Material

**Table S1.** SHRIMP-RG Ion Microprobe Data: Individual  $^{206}\text{Pb}/^{238}\text{U}$  Zircon Dates.

**Table S2.** Chemical data for plutonic rocks near Long Valley.

**Figure S1.** Compositions of 114 samples of Mesozoic plutonic rocks around Long Valley Caldera, almost exclusively the units distinguished by labels in Figure 4.

**Figure S2.** Plot of  $\text{K}_2\text{O}$  vs.  $\text{SiO}_2$  for all of our samples in Table S2.

# Long Valley Region Plutonic Rocks

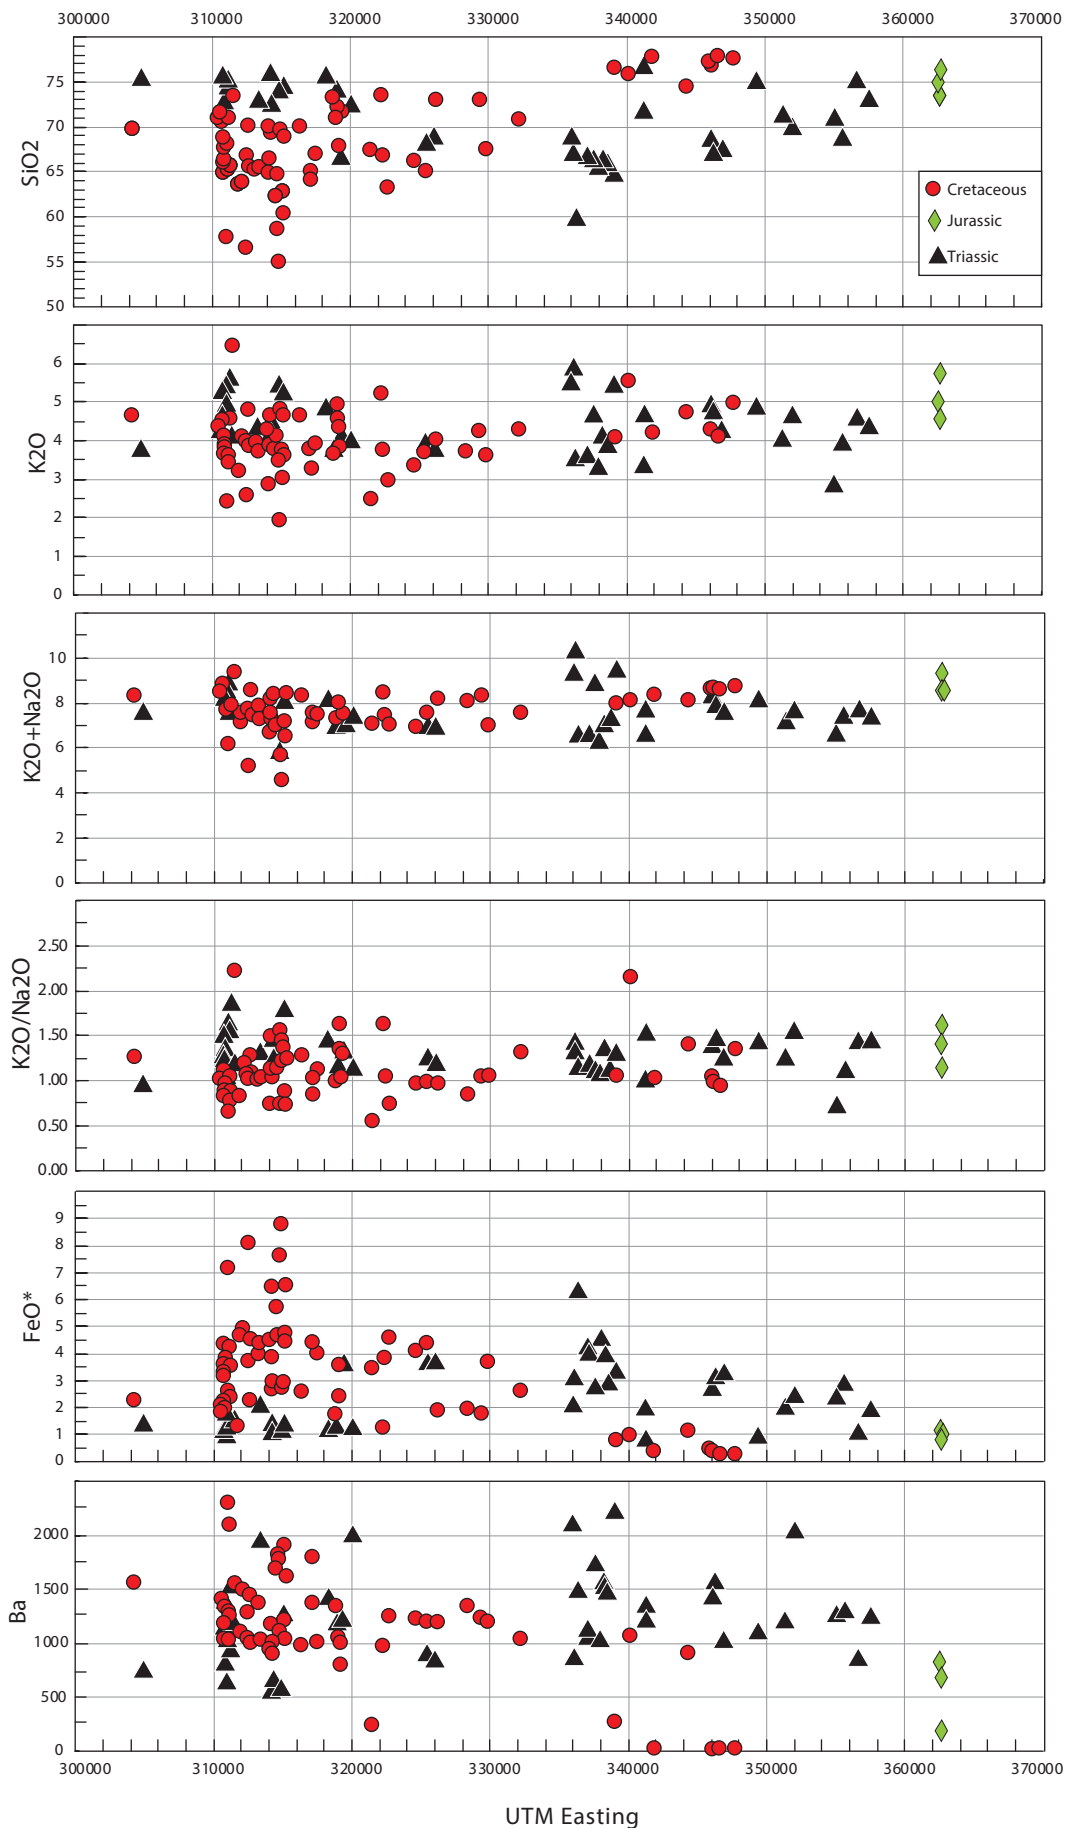

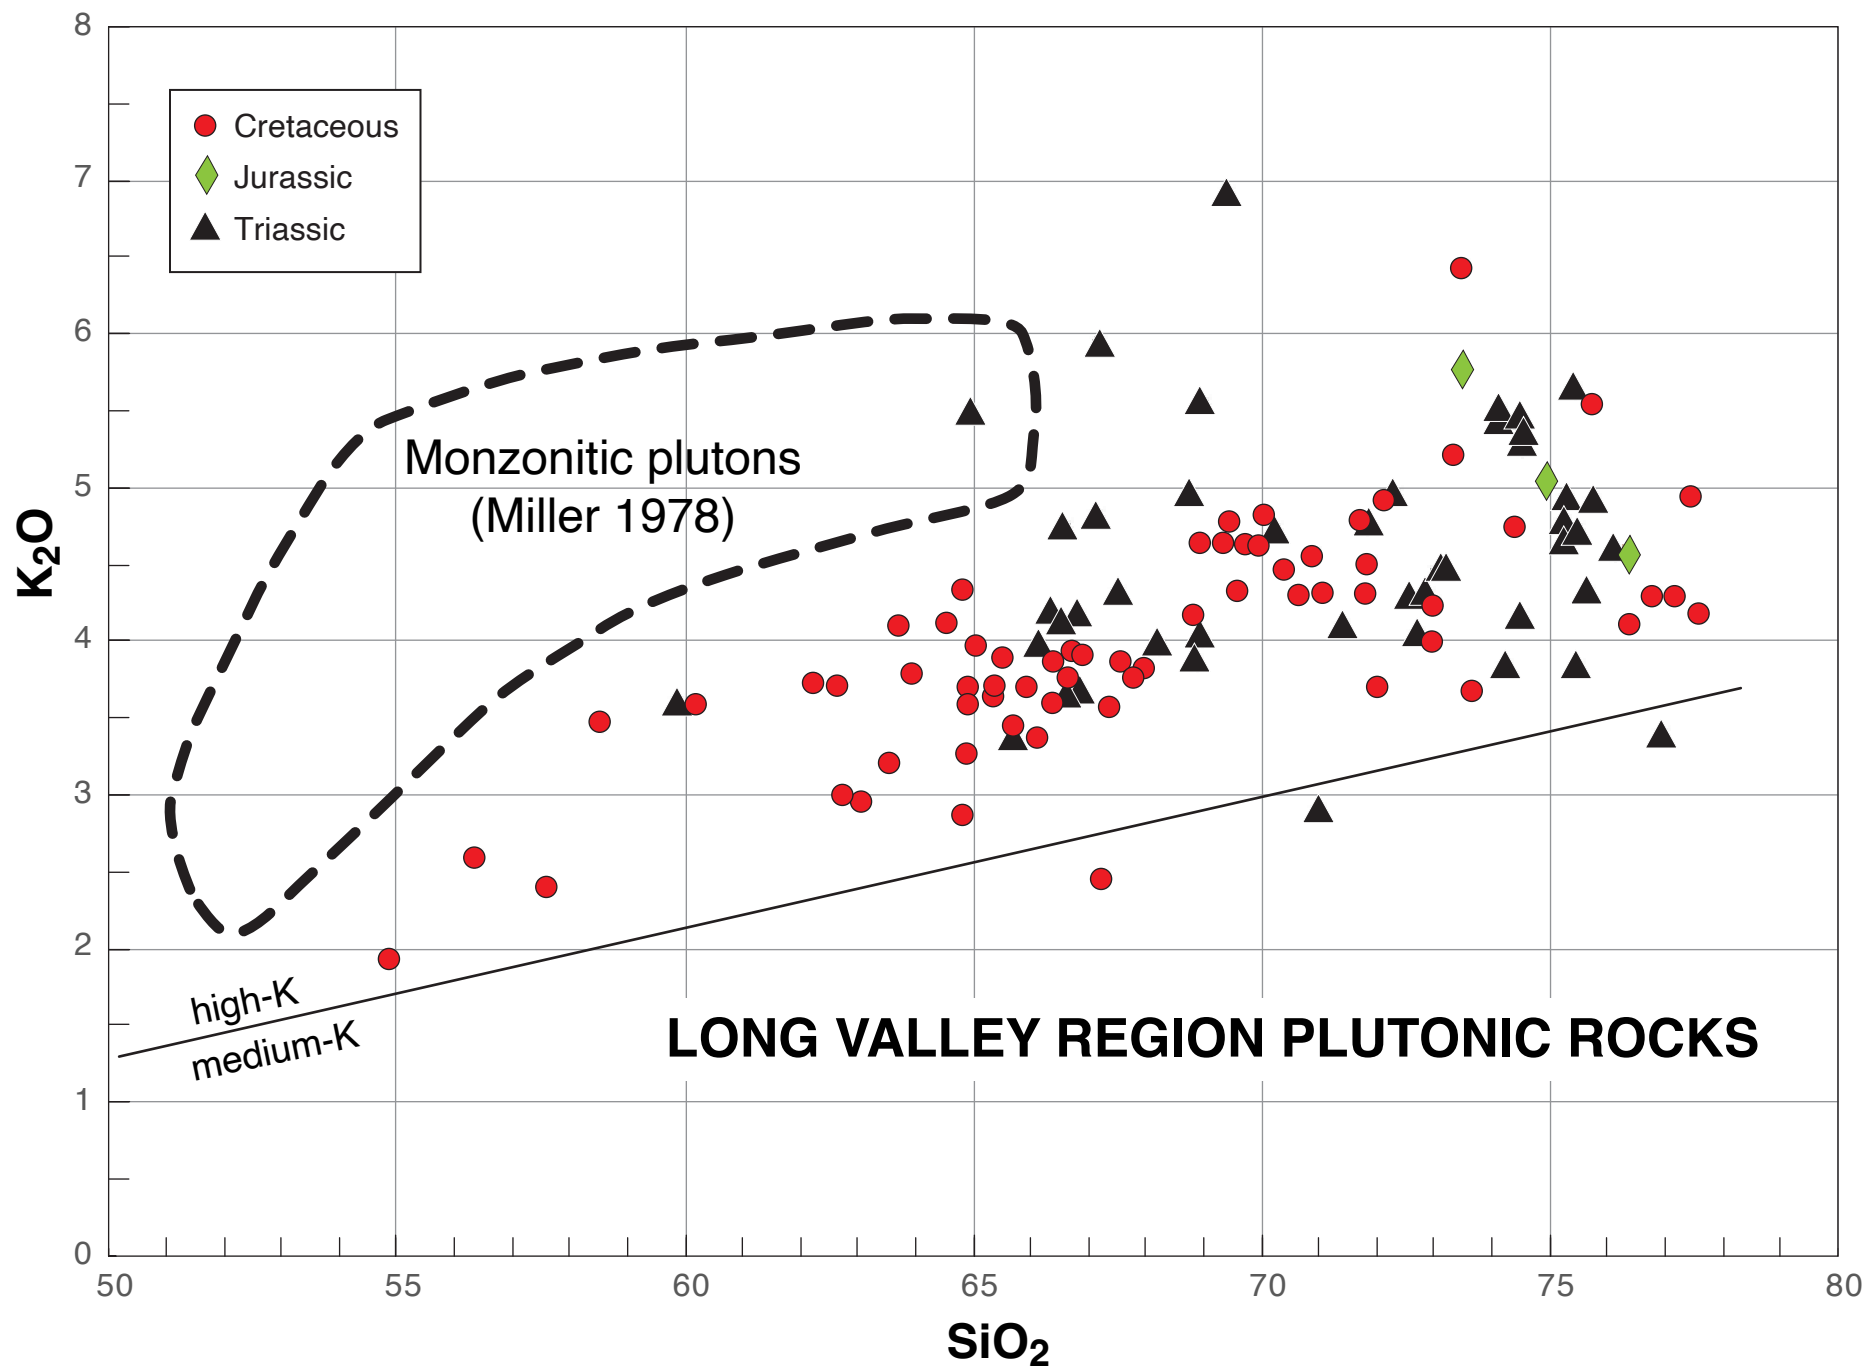

Supplement: Supplementary file 1 [file 1]
