# Supplementary material
Source: publisher figshare collection journal article supplement (https://gsapubs.figshare.com/articles/dataset/_/21676805)
Supplement: Supplementary file 1 [file 1]

## Sheet: DATA
Table S2. Granitioid Compositions near Long Valley
														original	Ba	Zr	Ce	Cr	Cs	Cu	Dy	Ga	Hf	La	Nb	Nd	Ni	Pb	Rb	Sc	Sm	Sn	Sr	Th	U	V	Y	Yb	Zn	Zr
Sample	label	UTM Easting	UTM Northing	SiO2	TiO2	Al2O3	FeO*	MnO	MgO	CaO	Na2O	K2O	P2O5	total	ppm	ppm	ppm	ppm	ppm	ppm	ppm	ppm	ppm	ppm	ppm	ppm	ppm	ppm	ppm		ppm	ppm	ppm	ppm	ppm	ppm	ppm	ppm	ppm	ppm
	Cretaceous
M-781	Klo Point 7456	344383	4179748	74.42	0.15	14.02	1.13	0.07	0.3	1.36	3.38	4.72	0.05	98.66	899	83	29	4	5	1		18		18	13.3	12	2	31	224	3			278	15	8	13	9		32	83
M-782	Klo O'Harrel	346080	4179920	77.19	0.05	12.9	0.38	0.26	0.02	0.26	4.26	4.27	0.01	98.26	4	57	21	3	35	0		23		10	126.1	12	3	45	713	8			2	17	20	2	22		50	57
M-784	Klo Point 7340	341870	4180140	77.64	0.05	12.82	0.38	0.18	0.02	0.2	4.12	4.17	0.02	98.49	22	35	27	3	60	0		23		8	77.5	15	3	49	638	5			7	20	15	2	17		50	35
M-788	Kbs Big Springs	329460	4179670	72.98	0.19	14.44	1.73	0.04	0.33	1.53	4.07	4.22	0.07	98.8	1216	146	50	2	3	2		17		27	10.6	18	2	8	111	2			250	11	2	13	13		26	146
M-986	Kbs N of Big Springs	328500	4181036	72.01	0.22	15	1.92	0.09	0.43	1.78	4.38	3.69	0.09	98.44	1338	167	54	5		1		17		33	11.3	19	6	12	118	3			290	11	2	12	14		39	167
M-987	Kjl Hill 8508 ("Deer Pk")	322317	4185293	73.38	0.22	14.25	1.21	0.02	0.4	1.65	3.21	5.2	0.07	98.65	973	106	54	6		8		16		48	7.2	13	2	18	224	3			272	28	5	20	8		23	106
M-989	Kjl above Oh Ridge	319270	4184770	71.83	0.39	14.07	2.43	0.04	0.83	2.27	3.34	4.29	0.11	99.2	782	175	59	11		10		17		34	11.2	20	7	13	206	5			294	37	9	47	14		28	175
M-1016	Kjl Northshore Dr	316400	4183740	70	0.43	14.93	2.56	0.04	0.9	2.38	3.65	4.61	0.12	99.83	975	204	66	8		6		17		34	11.2	24	5	16	226	5			323	27	5	45	16		35	204
M-1023	Kae? boulder in pal	329944	4180196	67.39	0.41	15.81	3.67	0.08	1.44	3.68	3.39	3.57	0.15	98.88	1187	134	54	5	6	5		16		30	9.4	19	2	16	132	6			454	18	7	60	14		50	134
M-1033	Kbs NE of Crestview	326280	4181120	72.99	0.18	14.53	1.84	0.08	0.43	1.36	4.13	3.99	0.07	97.7	1192	149	27	3	3	0		16		14	10.4	13	1	11	121	2			226	12	3	12	15		30	149
M-1133	Klo Glass Mtn toe	347842	4179090	77.51	0.05	12.89	0.22	0.02	0.05	0.16	3.74	4.94	0.01	99.14	14	55	21	5		2		26		7	104.5	12	4	29	705	7			11	13	12	4	22		7	55
M-1248A	Kae Rush Crk distal gorge	317216	4198106	63.96	0.71	16.48	4.35	0.07	2.16	4.18	3.71	3.78	0.22	99.93	1799	197	45	33	1	4	1.9	19	4.1	24	9.7	20	17	14	121	8.8	3.4	1	574	11	5	87	10.1	0.5	60	197
M-1248B	Kae Rush Crk distal gorge	317210	4198100	64.9	0.67	16.57	4.38	0.09	1.64	3.96	3.92	3.26	0.22	99.1	1367	157	60	6	4	3	2.8	18	3.2	30	10.1	22	3	13	100	8.4	4.1	3	589	11	3	79	15.4	2.6	69	157
M-1256	Klo white NE caldera wall	340255	4181161	75.76	0.13	13.29	0.94	0.01	0.19	1.16	2.58	5.52	0.02	99.02	1060	93	36	3	4	2	1.1	12	1.9	25	14.4	7	0	14	256	1.2	1	0	258	47	16	7	6.9	1.6	4	93
M-1257	Kae Aeolian Buttes, top	317550	4192440	66.95	0.57	15.25	4.03	0.07	1.71	3.43	3.54	3.89	0.18	99.48	1001	142	63	21	6	106	2.3	18	3.1	29	9.7	25	10	12	168	6.7	4.4	3	483	19	6	85	11.9	0.6	40	142
M-1258	Kae South Aeolian monument	319232	4189263	67.82	0.52	15.19	3.54	0.05	1.58	3.32	3.65	3.76	0.16	99.02	982	130	54	20	2	75	1.8	18	2.4	33	8.7	19	10	10	160	5.8	2.9	0	483	21	7	74	10	1.6	35	130
M-1262	Klo O'Harrel	346620	4180560	77.62	0.05	12.66	0.19	0.26	0.05	0.23	4.38	4.15	0.01	99.72	12	48	24	3	8	1	3.1	24	2.7	7	102.3	11	0	57	551	5.7	2.9	1	10	12	26	2	22	1.1	14	48
M-1265	Klo O'Harrel	346174	4179712	76.82	0.05	13.14	0.32	0.28	0.06	0.26	4.39	4.27	0.01	99.52	5	64	30	4	4	1	4.3	23	3.7	11	86.6	13	0	57	436	7	3.5	0	5	18	46	1	30.3	2.5	7	64
M-1303	Kae Snowstorm knob	312800	4188900	65.55	0.6	15.71	4.51	0.07	1.77	3.7	3.61	3.87	0.2	99.3	998	145	58	25	2	2	2.1	19	3.1	35	9.9	21	11	12	144	5.3	3.4	0	520	33	7	95	9.3	1.2	53	145
M-1304	Kae Park/Saw East	311280	4191820	65.72	0.59	16.98	3.5	0.09	1.21	3.38	4.51	3.43	0.19	99.09	2089	198	50	5	1	5	2.6	18	4.6	23	10.6	21	3	14	118	7	4	4	543	15	4	52	15.1	2.5	60	198
M-1305	Kae Park/Saw East	311200	4191840	65.4	0.72	16.13	4.26	0.11	1.51	3.51	4.13	3.63	0.2	99.01	1229	215	66	9	6	9	4	19	5.7	33	12.5	31	2	17	120	11.6	5.7	0	385	10	4	78	24.2	2.1	72	215
M-1306	Kae Park/Saw E toe	311526	4191769	73.49	0.34	13.95	1.27	0.03	0.19	0.96	2.91	6.42	0.04	98.75	1535	275	55	4	2	2	2.7	13	7.5	28	12.4	24	1	32	203	4.6	4.1	4	126	21	5	11	19.2	3	32	275
M-1308	Kae Grant Lake SW shore	314300	4187700	66.43	0.56	15.63	3.84	0.07	1.77	3.63	3.66	3.84	0.17	99.14	985	130	57	19	7	4	2.1	18	2.9	31	8.5	22	10	14	138	8.7	3.6	2	518	23	6	78	12.5	1	53	130
M-1310	Kjl Reversed Pk (RB)	314326	4186007	69.64	0.46	15.08	2.64	0.05	0.97	2.53	3.79	4.32	0.12	98.51	907	199	62	8	10	9	2.7	17	4.9	31	11.2	22	4	15	198	6.1	4	0	339	26	8	45	16.3	2.1	31	199
M-1311	Kae? Rush Ck narrows (LB)	314288	4186949	64.84	0.92	13.69	6.42	0.11	2.76	3.36	2.91	4.32	0.27	98.88	1168	204	74	32	3	5	3.2	19	4.9	37	12.8	32	16	14	162	11.2	5.6	2	360	33	9	139	16.8	1.5	87	204
M-1322	Kmo Horseshoe Lake	321535	4163892	67.25	0.54	16.13	3.4	0.1	1.19	3.81	4.57	2.44	0.17	98.57	234	176	81	7	5	1	2.3	21	3.6	48	12	28	2	12	85	6.7	4.2	0	492	10	2	52	11.9	1.6	75	176
M-1323	Krv Mammoth Rock trail	324665	4164771	66.14	0.46	16.22	4.09	0.09	1.59	3.96	3.52	3.35	0.17	98.21	1217	137	42	8	5	4	2.3	17	2.5	22	10.5	18	3	17	119	7.7	3.3	4	484	14	2	64	13.1	1.9	60	137
M-1326	Krv Laurel Mtn mass	332300	4164100	70.69	0.29	14.58	2.57	0.07	1.04	2.73	3.25	4.27	0.1	97.52	1034	97	44	8	4	5	1.5	14	2	21	7.5	16	2	63	151	4.1	2.7	0	340	11	6	41	9	1.4	43	97
M-1327	Kmo Reds Lake	318900	4163200	73.68	0.16	14.17	1.67	0.06	0.41	2.08	3.66	3.65	0.06	97.42	1330	74	30	4	2	3	1	13	2.2	16	5.6	11	1	12	107	2.9	1.7	0	251	10	3	15	8.3	1.5	19	74
M-1334	Kae Williams Butte SW mass	313300	4197600	65.09	0.65	16.25	3.96	0.08	1.8	3.76	3.88	3.94	0.19	98.92	1362	209	68	25	2	13	2.7	17	4.6	31	10	27	12	14	135	8.4	4.9	6	484	19	3	84	15.2	1.9	62	209
M-1344	Kae? clast Shaft 1	325450	4187262	64.97	0.62	15.92	4.35	0.08	2.07	3.92	3.8	3.69	0.18	99.02	1187	203	59	34	1	49	2.2	17	4	33	10.7	22	13	14	133	8.7	3.6	3	490	14	6	88	13	1	58	203
M-1361-A	Kae Park/Saw South	311150	4191090	57.65	1.11	17.57	7.16	0.19	3.06	6.44	3.71	2.39	0.33	98.26	1027	123	42	4	1	7	3.8	21	2.5	23	7.8	23	4	6	97	17.1	4.6	0	661	4	4	170	20.1	1.7	100	123
M-1361-B	Kae Park/Saw South	311150	4191090	68.02	0.43	16.65	2.56	0.07	0.84	2.68	4.41	3.81	0.12	98.9	2288	176	48	8	2	1	1.5	17	2.9	24	8.5	14	5	15	118	3.4	2.5	0	502	12	4	36	8.8	1.1	44	176
M-1381	Kae windows E of Parker L	311982	4189995	63.57	0.75	16.78	4.67	0.2	1.86	4.45	3.91	3.2	0.2	99.37	1083	193	63	12	5	4	3.7	18	4.1	29	10.8	25	7	16	97	11.2	5	0	432	11	4	90	20.6	1.9	179	193
M-1382	Kae windows E of Parker L	312240	4190133	63.76	0.76	16.38	4.88	0.31	1.83	3.96	3.44	4.08	0.2	98.99	1474	221	57	15	6	1	3.4	17	5	25	12	22	9	21	118	11.8	4.4	0	410	12	4	95	21	2.3	185	221
M-1384	Kae Park/Saw North	310975	4193198	67.61	0.61	15.55	3.71	0.09	1.13	2.86	4.02	3.86	0.16	98.89	1142	198	89	11	5	2	4	17	5.1	48	13.1	36	4	14	134	9.2	6.1	2	325	22	7	59	23.8	2.9	46	198
M-1386	Kae Park/Saw North	310912	4192897	68.84	0.55	15.15	3.15	0.09	1.05	2.71	3.78	4.15	0.15	98.34	1036	163	63	11	2	3	3.1	16	3.3	33	12.1	24	5	12	159	6.5	4.2	0	308	22	7	58	19.8	1.7	46	163
M-1414	Kae clast Dome 27 ejecta ring	322435	4188090	66.69	0.54	15.67	3.78	0.07	1.64	3.65	3.66	3.74	0.17	98.61	966	132	52	23	2	4	1.9	18	2.4	27	8.5	19	11	14	129	6.6	3.2	1	523	18	5	79	8.8	0.6	53	132
M-1415	Klo white Inaja wall	339250	4181200	76.41	0.09	13.24	0.77	0.08	0.17	0.85	3.89	4.08	0.02	99.58	265	42	18	5	2	2	0.2	17	1.4	5	19.6	8	0	40	268	2.1	1.4	0	81	11	4	6	4.6	0.4	39	42
M-1418	Kjl Grant Lake SW shore	314384	4187069	69.4	0.48	15	2.95	0.06	0.93	2.35	3.67	4.63	0.14	99.23	1008	218	66	15	4	5	3	17	5.4	35	13.1	22	5	18	218	6.2	3.8	2	335	22	5	52	16.4	2.6	51	218
M-1456	Kle Ellery Lake	304300	4200700	69.74	0.37	15.49	2.28	0.04	0.87	2.43	3.66	4.61	0.11	98.69	1559	186	71	16	4	3	1.6	20	3.5	43	8.6	21	5	17	210	4.9	2.6	0	463	26	5	41	5.9	1.8	65	186
M-1469	Kae Williams Butte SE mass	314149	4197508	64.88	0.69	16.35	4.46	0.07	1.95	4.32	3.85	2.85	0.2	99.48	924	178	50	37	3	7	2.2	18	3.4	29	8.5	16	17	11	108	7	2.5	2	616	13	3	94	9	1.6	59	178
M-1470	Kae? Fine-grained Snowstorm	312675	4189398	70.1	0.38	15.25	2.22	0.05	0.59	2.36	3.76	4.79	0.11	99.4	1427	256	62	11	4	0	2.9	15	6	32	12.2	24	3	14	168	4	4.1	3	397	22	5	25	17	2.1	35	256
M-1471-C	Kae? clast. West Portal	319200	4191750	72.16	0.37	13.83	2.38	0.04	0.9	1.88	3.03	4.91	0.11	98.73	1031	130	49	15	2	5	1.8	16	3.2	25	9.2	15	6	15	235	3.5	2.3	0	294	26	5	46	8	1.4	29	130
M-1471-D	Kae? clast West Portal	319200	4191750	70.9	0.37	14.54	2.46	0.05	0.97	2.31	3.36	4.53	0.11	99.59	1011	127	58	17	3	48	2.1	17	2.7	35	8.2	17	7	12	221	4.2	2.4	0	365	24	4	48	9	1.4	33	127
M-1472	Kae Park/Saw S end	310953	4191473	66.41	0.66	16.54	3.53	0.12	1.11	3.12	4.33	3.59	0.18	99.08	1364	207	71	10	2	0	3.9	18	5	39	13.4	29	4	15	114	8.2	5.3	0	404	13	3	56	24	2.5	55	207
M-1473	Kae Park/Saw	310729	4191500	71.09	0.33	15.24	2	0.05	0.53	1.74	4.21	4.3	0.09	99.28	1388	175	61	8	3	0	2.6	17	4.3	34	10.2	22	2	17	151	2.9	3.6	0	244	16	5	23	15	2	37	175
M-1474	Kae Park/Saw	310885	4191609	65.96	0.73	16.11	3.29	0.1	1.3	3.71	4.51	3.68	0.21	99.16	1180	206	53	8	2	0	3.9	16	5	24	11.5	28	3	14	112	10	5.7	4	367	12	5	62	24	2.5	46	206
M-1477-A	Kae Park/Saw N end	310890	4192273	64.95	0.73	16.49	4.29	0.1	1.47	3.7	4.09	3.59	0.19	99	1306	219	57	10	1	5	3.9	18	5.3	30	11.8	24	4	12	109	10.6	4.7	0	405	10	2	83	24	2.1	52	219
M-1478	Kae Peak 7970	315155	4187394	62.68	0.8	17.68	4.41	0.09	1.57	4.22	4.22	3.7	0.25	99.02	1896	271	66	12	2	14	3.6	19	5.7	33	13.2	26	6	15	128	9.1	5.2	3	573	11	4	83	19	2	57	271
M-1479	Kjl Peak 7970	315106	4187354	69.5	0.44	15.21	2.76	0.04	0.91	2.36	3.49	4.76	0.12	99.28	1092	198	58	12	3	19	3	17	5.2	27	10.7	20	4	14	233	5.1	3.9	0	324	24	6	50	15	2	32	198
M-1480	Kae Peak 7970	315173	4187609	62.79	0.71	17.23	4.69	0.08	2.09	4.71	4.09	3	0.21	99.11	1219	208	59	32	2	10	2.9	18	4.8	30	10.2	25	13	12	112	10	4.5	0	583	12	4	96	14	1.8	61	208
M-1511	Kae? clast. Domes 25/26 ring	322800	4189300	63.11	0.8	16.71	4.6	0.09	2.29	4.85	3.99	2.94	0.23	98.48	1253	229	127	32	0	12	3.6	20	4.3	68	13	42	15	12	119	9.3	6.9	0	563	31	7	100	20	2.8	105	229
M-1525	Kae Park/Saw	311241	4190923	70.9	0.34	14.89	2.31	0.1	0.42	1.76	4.25	4.54	0.1	98.64	1274	186	40	3	3	6	3.2	14	4.9	17	14.8	23	0	20	156	2.3	4.4	0	216	14	4	27	21	1.4	148	186
M-1526	Kae Park/Saw	310749	4191294	70.47	0.36	15.29	2.17	0.08	0.61	1.82	4.25	4.45	0.11	99.73	1358	182	75	5	4	0	2.9	15	4.2	43	11.4	25	3	18	164	3.7	3.7	0	256	17	2	26	17	1.7	83	182
M-1527-A	Kae Park/Saw	310802	4191861	71.91	0.32	14.81	1.77	0.06	0.46	1.61	4.1	4.48	0.09	98.67	1395	174	54	4	3	0	2.7	14	4	31	10.6	20	1	14	140	2.4	3.1	2	223	15	5	24	16	2	72	174
M-1528	Kae Park/Saw	310888	4192467	71.74	0.32	14.73	1.91	0.05	0.46	1.71	3.82	4.78	0.09	99.38	1314	174	45	4	2	0	2.7	15	4.1	23	8.4	17	2	11	141	2.4	2.8	0	255	14	3	23	15	1.8	69	174
M-1530	Kjl Reversed Peak	315219	4185726	68.98	0.48	15.34	2.83	0.05	0.95	2.49	3.73	4.62	0.13	98.72	1024	229	62	8	8	0	3.2	16	5.6	31	11.4	26	4	15	204	6.2	4.6	0	330	27	10	56	18	1.5	78	229
M-1533	Mzdi Reversed Peak	314710	4185232	64.59	0.59	15.89	4.63	0.1	1.88	4.8	2.85	4.11	0.15	98.12	1812	179	55	7	4	6	3.6	15	4.7	27	9.9	26	4	16	146	15.1	4.9	4	382	15	5	122	23	2.9	98	179
M-1534	Mzdi Reversed Peak	314590	4185026	62.26	0.66	16.45	5.68	0.09	2.37	4.96	3.23	3.72	0.18	98.34	1682	161	59	9	1	4	3.9	15	3.8	33	9.6	28	5	9	121	16.4	5.2	0	413	12	4	147	23	3.3	73	161
M-1535	Mzdi Reversed Peak	314958	4183234	54.89	0.94	17.8	8.76	0.16	3.97	8.27	2.6	1.92	0.28	98.36	1101	106	46	12	4	13	4.4	20	2.9	22	8	23	8	7	64	27.5	5.2	3	505	6	2	277	24	2.3	129	106
M-1536	Kae? 1 km NW of M-1311 site	313500	4187600	65.39	0.69	15.57	4.37	0.08	2.07	4	3.56	3.69	0.2	98.85	1013	145	62	20	2	0	2.9	17	2.9	30	10.6	23	11	11	127	7.8	4	0	544	24	7	100	15	1.5	105	145
M-1544	Mzdi Reversed Peak	315300	4184500	60.23	0.74	16.65	6.5	0.12	2.79	5.89	2.88	3.59	0.2	98.62	1607	138	76	7	3	26	4.1	16	3.8	42	8.9	35	4	7	124	20	6.5	3	431	11	4	182	24	2.5	90	138
M-1561	Mzdi N of Gull Lake	314846	4182747	58.58	0.86	17.2	7.62	0.18	3.48	5.78	2.21	3.44	0.25	98.06	1766	128	43	12	7	42	4.2	17	3.8	24	8.2	23	12	12	103	24	4.5	3	465	10	4	210	22	2.1	84	128
M-1619	Kae Snowstorm, top diorite	312610	4189075	56.3779	0.811251	17.5534	8.06812	0.179879	3.36692	7.82982	2.57115	2.57829	0.263293	99.1382	1278.7	137.904	46.2287	5.84351	3.14456	50.086	4.33497	20.6	3.89654	24.72	11.4598	23.4708	6.95362	12.9619	109.302	21.0037	4.57235	3.82896	544.915	8.05823	1.67697	224.947	25.1074	2.23047	119.698	137.904
M-1620	Kae Snowstorm middle ledge	312650	4189050	66.7496	0.535935	15.5575	3.72041	0.0630188	1.63452	3.58643	3.65948	3.92641	0.166727	99.2358	1027.76	126.137	52.4634	19.2683	0.784687	2.48624	2.36991	16.5186	3.78306	34.9866	7.77641	19.1892	11.133	14.9358	146.861	7.34092	2.56896	1.65001	511.71	23.3632	5.48946	80.9445	10.4838	0.755839	49.4852	126.137
	Jurassic
M-1244	Jcd Casa Diablo Mtn	362666	4159665	76.36	0.11	12.95	0.82	0.06	0.15	0.56	3.98	4.58	0.03	99.36	194	94	42	5	2	1	2	17	3.2	22	14.9	14	0	16	215	1.2	2.4	0	54	22	8	4	13.1	1.3	23	94
M-1245	Jcd Casa Diablo Mtn south	362660	4156650	73.49	0.19	14.37	0.97	0.02	0.19	1	3.56	5.76	0.05	99.25	682	132	101	3	2	1	3.6	14	3.9	64	12.9	36	0	12	174	2.4	5.3	2	168	20	4	5	24.2	2.9	10	132
M-1250	Jcd Benton Range Hwy 120	362485	4183450	74.99	0.14	13.48	1.09	0.05	0.25	0.97	3.57	5.02	0.04	99.49	828	107	66	4	3	1	1.8	13	2.9	36	15.3	20	0	20	196	2.2	3	0	151	19	2	5	13	1.1	11	107
	Triassic
M-783	Trwc O'Harrel	346100	4179920	68.81	0.26	15.63	2.79	0.09	0.64	2.88	3.44	4.94	0.13	98.68	1430	110	46	4	1	1		16		28	14	18	2	11	230	4			474	15	4	38	14		34	110
M-785	Trwc Wilfred Canyon	351940	4175460	70.25	0.27	15.23	2.52	0.07	0.64	2.77	3.02	4.71	0.11	98.61	2059	136	51	3	2	2		15		31	12.4	17	3	9	184	4			518	23	4	37	12		36	136
M-789	Trec SE of Crestview	326040	4179580	68.9	0.41	15.2	3.7	0.1	0.91	3.26	3.15	3.85	0.12	98.5	850	182	57	6	9	3		18		32	13.8	22	3	18	166	6			374	19	5	46	19		58	182
M-793	Trds Round Mtn	355080	4164025	71	0.27	15.33	2.45	0.08	0.69	3.01	3.79	2.87	0.11	98.56	1278	131	62	3		3		16		38	14.1	21	2	10	126	4			479	20	4	33	14		37	131
M-796	Trwc Little Round Valley	349350	4159120	75.31	0.11	13.43	1	0.06	0.19	1.23	3.34	4.9	0.03	98.88	1114	78	37	3		3		13		25	21.9	14	1	15	221	2			225	27	6	9	17		15	78
M-827	Trmc Inaja knoll	338590	4180220	66.15	0.35	17.19	2.95	0.09	0.98	4.38	3.42	3.94	0.16	99.29	1508	121	69	5		3		16		45	13.5	20	4	10	174	5			610	20	4	62	12		31	121
M-835	Trdp Deadman Pass	318930	4173350	74.24	0.13	14.29	1.4	0.06	0.29	2.1	3.23	3.81	0.04	99.04	1199	96	28	4		3		13		15	7.8	8	0	20	130	4			282	20	6	15	10		41	96
M-1013	Trms NE of Minaret Summit	319410	4171120	66.85	0.58	16.32	3.64	0.1	1.46	3.28	3.06	4.13	0.17	99.15	1230	155	57	8		65		16		33	12.5	22	4	42	121	10			381	14	4	85	19		88	155
M-1015	Trlv S of Silver Lake	313370	4182160	73.11	0.17	14.04	2.08	0.07	0.43	1.86	3.33	4.44	0.07	99.01	1977	138	59	4		5		15		31	9.3	19	1	15	156	3			276	17	1	18	16		36	138
M-1015 R	Trlv S of Silver Lake	313370	4182160	73.09	0.17	14.02	2.15	0.07	0.43	1.85	3.32	4.44	0.07	99.71	1981	135	54	4		4		14		32	9.5	19	1	15	158	3			281	17	4	18	16		36	135
M-1026	Trwc McGee Mtn	341238	4162460	71.85	0.22	14.54	2.04	0.07	0.63	2.41	3.03	4.72	0.08	98.58	1366	82	35	5	3	2		14		21	10.3	13	1	11	207	3			375	20	5	34	10		21	82
M-1027	Trmm McGee Mtn	341250	4162400	76.96	0.12	13.11	0.86	0.02	0.26	1.57	3.29	3.38	0.03	98.73	1239	85	49	4	4	5		12		25	15.9	17	0	14	123	3			286	18	3	16	16		6	85
M-1030	Trdp Deadman cirque	318256	4173640	75.77	0.11	13.02	1.31	0.05	0.21	0.89	3.32	4.88	0.03	98.78	1442	101	34	3	0	6		13		25	10.8	12	0	22	166	3			155	20	4	6	14		28	101
M-1031	Trww White Wing Mtn	320085	4175355	72.7	0.21	14.89	1.3	0.04	0.37	2.54	3.46	4.02	0.07	98.08	2015	155	39	3	3	4		15		25	10.6	14	1	12	136	2			296	15	3	16	13		26	155
M-1032	Trec N of Crestview	325530	4181890	68.22	0.44	15.77	3.75	0.11	0.99	3.18	3.09	3.94	0.12	98.43	925	181	59	10	7	16		19		33	15.5	23	5	16	172	6			357	17	5	50	18		144	181
M-1246	Trds SE of Deer Spring	357536	4167510	73.12	0.22	14.05	1.99	0.07	0.59	2.04	3.02	4.43	0.08	99.07	1266	100	56	3	3	0	1.9	14	1.8	27	13.1	15	0	12	191	3.3	2.6	0	311	24	6	22	12.6	1.2	27	100
M-1249	Trwc Sagehen Peak	337950	4190510	65.75	0.47	16.31	4.56	0.14	1.34	4.44	3.05	3.34	0.21	99.02	1049	141	69	9	4	3	3.7	16	3.1	36	18.1	28	4	12	139	7.5	5.2	6	591	12	4	63	21.2	2	58	141
M-1263	Trwc O'Harrel	346872	4180803	67.53	0.31	15.88	3.31	0.12	0.9	3.73	3.38	4.3	0.16	99.32	1031	115	52	2	4	4	2.6	17	2.5	27	14.1	17	1	12	221	4.8	3.3	1	480	21	5	49	14.8	1.5	48	115
M-1264	Trwc O'Harrel	346350	4180280	67.18	0.3	16.11	3.13	0.11	0.88	3.71	3.24	4.79	0.15	99.29	1575	94	56	5	2	11	2.7	15	2.3	34	13.9	20	3	8	222	4.4	3.5	0	538	23	6	50	15.5	1.4	36	94
M-1307	Trlv Parker Lake till bench	311500	4190350	74.52	0.16	13.48	1.69	0.07	0.38	1.58	3.52	4.14	0.06	99.25	1198	90	46	4	3	1	2.8	13	2.6	25	9.7	15	1	14	154	3.2	2.9	0	179	17	4	12	17.8	2	23	90
M-1309	Trds Watterson Canyon	351300	4167200	71.42	0.24	14.92	2.12	0.08	0.69	2.77	3.19	4.07	0.1	98.57	1217	96	39	3	5	2	1.9	15	2.2	16	12.1	13	1	10	182	3.4	2.7	0	409	22	4	28	11.6	1.3	30	96
M-1311-A	Trlv? Rush Ck narrows (LB)	314288	4186949	72.63	0.24	14.59	1.44	0.05	0.5	2.47	3.34	4.26	0.07	99.29	668	84	51	4	3	1	2.4	14	1.1	35	7.6	14	2	16	170	2.7	1.4	1	388	33	6	26	12	1.7	71	84
M-1311-B	Trlv Rush Ck narrows (LB)	314288	4186949	76.16	0.11	12.91	1.16	0.04	0.15	1.4	3.08	4.56	0.03	99.78	576	94	43	5	2	4	2.5	10	2.1	22	10.2	16	0	22	171	1.2	2.4	0	130	25	3	9	16	2.3	73	94
M-1313	Trwc Gaspipe Sprg Hwy cut	337560	4195300	66.62	0.27	17.11	2.78	0.11	0.64	3.02	4.19	4.73	0.12	98.98	1756	158	66	4	4	3	2.8	16	3.2	37	10.6	23	2	12	130	4.2	3.9	4	550	11	2	36	17.8	2.1	43	158
M-1319	Trwc Lower Rock Crk Road	355660	4153670	68.98	0.27	15.67	2.88	0.1	0.82	3.22	3.54	4	0.11	98.5	1324	137	63	4	8	5	2.4	15	3.4	34	11.3	21	1	15	173	5.5	3.5	0	422	23	4	37	15.5	1.8	39	137
M-1320	Trwc E of Sherwin Summit	356650	4157650	75.35	0.14	13.35	1.16	0.06	0.28	1.46	3.15	4.62	0.04	98.29	873	84	39	4	6	0	2.1	12	1.8	26	16	12	0	22	236	2	2	0	226	29	7	8	14.8	1.4	20	84
M-1321	Trds Wilfred Canyon	351913	4175496	69.44	0.26	16.04	1.94	0.02	0.36	2	2.56	6.9	0.07	97.79	6098	165	121	3	4	7	1.2	13	2.5	74	7.7	30	2	12	224	1.6	3.3	1	660	26	3	23	8.3	0.5	16	165
M-1324	Trwc NE of Baxter Spring	339050	4195810	64.99	0.34	17.27	3.36	0.11	0.8	3.05	4.1	5.47	0.12	98.14	2236	189	73	3	0	1	3.3	17	4	43	15.1	27	2	12	155	4.3	4.4	0	554	15	4	40	22.3	2.5	38	189
M-1360	Trlv Park/Saw South	311250	4191200	75.45	0.22	12.78	1.47	0.03	0.22	0.79	2.99	5.61	0.04	99.26	952	194	35	7	5	1	2.7	15	4.9	8	10	17	1	16	148	2.7	3.8	0	147	21	6	12	19	2	24	194
M-1378	Trwc Cowtrack Mtn	336162	4198181	67.22	0.16	16.75	3.12	0.1	0.29	1.51	4.44	5.93	0.08	99.23	879	324	139	4	3	18	1.9	16	6.5	84	7.4	39	1	19	126	1.4	4.7	1	291	21	4	8	12.4	0.6	40	324
M-1379	Trwc south of Gaspipe Spg	337205	4193711	66.77	0.42	15.89	4.27	0.11	1.1	4.13	3.07	3.65	0.19	97.99	1113	124	50	5	5	1	3.2	18	2	20	16.6	20	4	13	128	8.1	4.3	1	578	14	6	60	17.9	1.6	46	124
M-1379 R	Trwc south of Gaspipe Spg	337205	4193711	66.83	0.42	15.91	4.15	0.11	1.09	4.14	3.09	3.66	0.19	97.81	1090	126	55	12	4	0	2.9	17	2.6	20	17.2	20	5	10	127	7.4	4.3	3	574	14	8	60	16.6	1.7	45	126
M-1383	Trlv Park/Saw North	310976	4193197	74.5	0.17	13.51	1.35	0.03	0.24	1.05	3.3	5.4	0.05	98.95	652	89	50	6	2	0	2.2	16	2.2	30	7.6	20	1	16	141	1.5	3.1	2	167	32	3	12	15.2	1.2	20	89
M-1385	Trlv Park/Saw North	310911	4192896	75.7	0.18	13.1	1.2	0.04	0.3	1.33	3.37	4.29	0.09	98.34	834	76	42	10	3	0	1	14	1.1	28	8.5	11	4	18	173	1	1.5	0	239	27	10	14	6.6	0.2	23	76
M-1388	Trlv Park/Saw North	311245	4192498	74.16	0.29	13.37	1.46	0.08	0.36	0.95	3.43	5.43	0.07	99.19	1534	257	65	6	2	7	3.2	13	6.1	29	13.5	26	1	44	139	2.5	4.9	0	154	9	5	5	20.4	2	53	257
M-1407	Trmc McLaughlin Ck LB	336340	4181220	59.91	0.69	17.2	6.37	0.15	2.33	6.01	3.04	3.59	0.31	98.59	1498	151	69	7	3	13	4.7	18	3.7	35	16.7	29	6	8	133	13.4	5.8	0	612	14	2	139	26	3	75	151
M-1408	Trmc McLaughlin CK RB cliff	336000	4181580	69.04	0.25	16.27	2.14	0.06	0.46	1.88	3.89	5.53	0.08	98.24	2118	160	60	4	7	1	2	15	2.4	42	10.3	18	2	13	197	2.2	2.5	0	583	16	4	18	12	1.4	28	160
M-1416	Trmc Inaja grey	338260	4180680	66.59	0.44	15.7	3.99	0.13	1.43	4.02	3.02	4.09	0.18	98.23	1539	153	76	7	3	1	3.2	16	2.7	43	16.4	25	4	9	155	8.1	4.2	1	491	22	3	82	19.6	1.6	43	153
M-1416 R	Trmc Inaja grey	338260	4180680	66.4	0.44	15.75	4.07	0.13	1.42	4.02	3.04	4.16	0.18	98.52	1573	153	80	10	2	1	2.9	17	3	41	15.6	28	5	9	157	8.1	4.6	0	498	21	6	82	18.7	0.9	44	153
M-1465	Trlv Tioga Road	304850	4202900	75.52	0.14	13.13	1.47	0.04	0.32	1.26	3.87	3.8	0.05	99.02	769	91	30	8	1	3	3	12	2.8	15	8.2	12	2	10	102	3	2.4	0	127	23	5	13	17.4	2.1	17	91
M-1475	Trlv Park/Saw	310890	4191610	74.58	0.14	13.68	1.37	0.02	0.11	0.88	3.47	5.32	0.03	99.04	1408	138	73	8	2	0	2.1	13	3.1	38	5.9	25	4	12	149	2.4	3.8	0	151	17	5	7	12	1.4	19	138
M-1476	Trlv Park/Saw top	310946	4191845	72.92	0.31	14.18	1.85	0.05	0.47	1.49	3.96	4.28	0.09	99.11	1060	180	58	7	2	0	3.2	15	4.8	32	14.6	23	1	12	148	2.8	4	0	197	18	5	22	20	2.8	32	180
M-1477-B	TrlvPark/Saw N end	310890	4192273	72.33	0.32	14.49	1.84	0.03	0.45	1.48	3.63	4.94	0.09	99.05	1219	166	60	8	3	0	2.9	15	4.3	30	10.9	21	1	13	156	3.2	3.8	0	209	14	3	22	16	1.9	23	166
M-1527-B	TrlvPark/Saw	310802	4191861	75.27	0.22	13.36	1.17	0.02	0.18	0.96	3.62	4.74	0.06	98.98	1166	108	51	4	3	0	2.4	11	2.4	23	9.6	16	0	10	162	2	2.8	0	185	22	5	18	13	0.7	63	108
M-1527-B R	TrlvPark/Saw	310802	4191861	75.28	0.22	13.37	1.16	0.02	0.18	0.96	3.6	4.74	0.06	99.24	1162	110	52	1	0	0	2.2	12	2	25	9	17	0	10	162	2	2.5	0	188	23	5	17	14	1.1	65	110
M-1529	Trlv. Park/Saw	310900	4192700	75.49	0.2	13.19	1.07	0.03	0.21	0.88	3.77	4.71	0.05	99.35	846	117	44	3	2	0	3.1	13	2.8	20	12.5	15	0	16	151	1.8	2.9	0	115	25	4	11	19	1.7	66	117
M-1531	Trlv Reversed Peak	315085	4185537	74.52	0.18	13.5	1.42	0.03	0.26	1.51	2.89	5.24	0.05	99.14	1271	134	66	2	4	1	3.1	11	3.1	37	9.9	21	0	17	207	2.9	3.3	2	196	29	5	18	20	1.9	74	134
M-1532	Trlv Reversed Peak	314912	4185399	74.18	0.23	13.88	1.28	0.09	0.41	3.52	0.48	5.47	0.05	98.6	579	154	66	3	3	0	3.3	13	4.6	38	11	24	0	12	179	3.8	3.9	0	97	28	7	22	21	1.5	79	154
M-1343	gr clast Shaft 2J	320709	4190636	74.92	0.15	13.19	1.65	0.04	0.36	1.43	3.4	4.42	0.05	98.83	1264	93	46	3	1	0	2.2	13	2	24	7.8	18	0	12	145	2.2	3.1	0	183	16	4	12	15.8	2	16	93
Major elements in weight percent; trace elements in ppm. Major elemnts are normalized to volatile-free total of 99.6% (leaving 0.4% for trace oxides and halogens).
Original Total is volatile-free weight before normalization. FeO* is total iron calculated as FeO.
Determinations by XRF spectrometry at GeoAnalytical Lab, Washington State University, or Hamilton College Analytical Lab; R. Conrey, analyst.
Unit labels as in Tables 1 and 2, this paper.
